# Supplementary material for: Antibacterial Enhancement of High-Efficiency Particulate Air Filters Modified with Graphene-Silver Hybrid Material
Source: MDPI journal article supplement (doi:10.3390/microorganisms11030745), 2023-03-14
Supplement: s1 [file s1]

# Supporting Information Material

## Antibacterial Enhancement of High-Efficiency Particulate Air Filters Modified with Graphene-Silver Hybrid Material

Alexandra Ciorîță <sup>1,2,\*</sup>, Maria Suciuc <sup>1,2</sup>, Maria Coroș <sup>2</sup>, Codruța Varodi <sup>2</sup>, Florina Pogăcean <sup>2</sup>,  
Lidia Măgerușan <sup>2</sup>, Valentin Mirel <sup>2</sup>, Raluca-Ioana Ștefan-van Staden <sup>3</sup> and Stela Pruneanu <sup>2,\*</sup>

<sup>1</sup> Faculty of Biology and Geology, Babeș-Bolyai University, 44 Republicii Street,  
400015 Cluj-Napoca, Romania

<sup>2</sup> National Institute for Research and Development of Isotopic and Molecular Technologies,  
67-103, Donat Street, 400293 Cluj-Napoca, Romania

<sup>3</sup> Laboratory of Electrochemistry and PATLAB, National Institute of Research for  
Electrochemistry and Condensed Matter, 202 Splaiul Independentei Street,  
060021 Bucharest, Romania

\* Correspondence: alexandra.ciorita@itim-cj.ro (A.C.); stela.pruneanu@itim-cj.ro (S.P.)

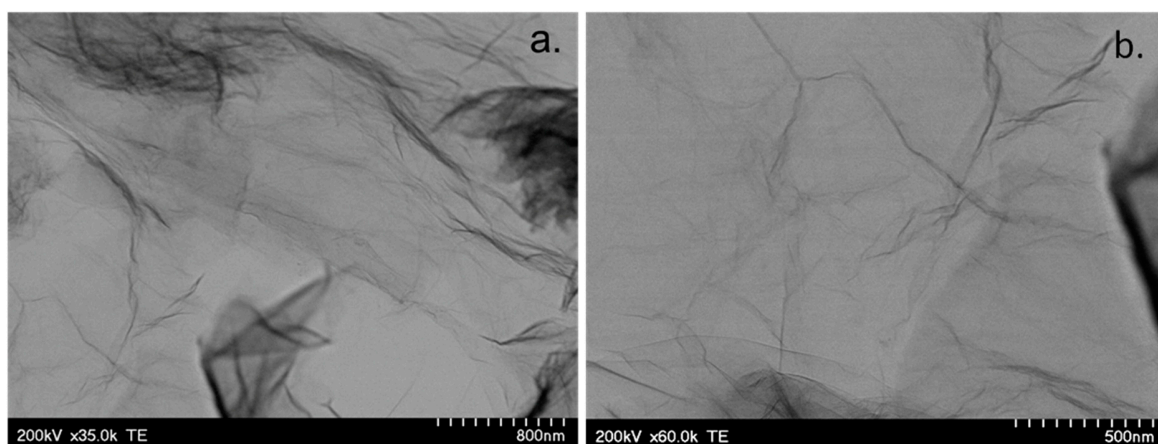

**Figure S1.** Representative TEM micrographs of reduced graphene oxide with no nanoparticles attached on its surface (a, b).

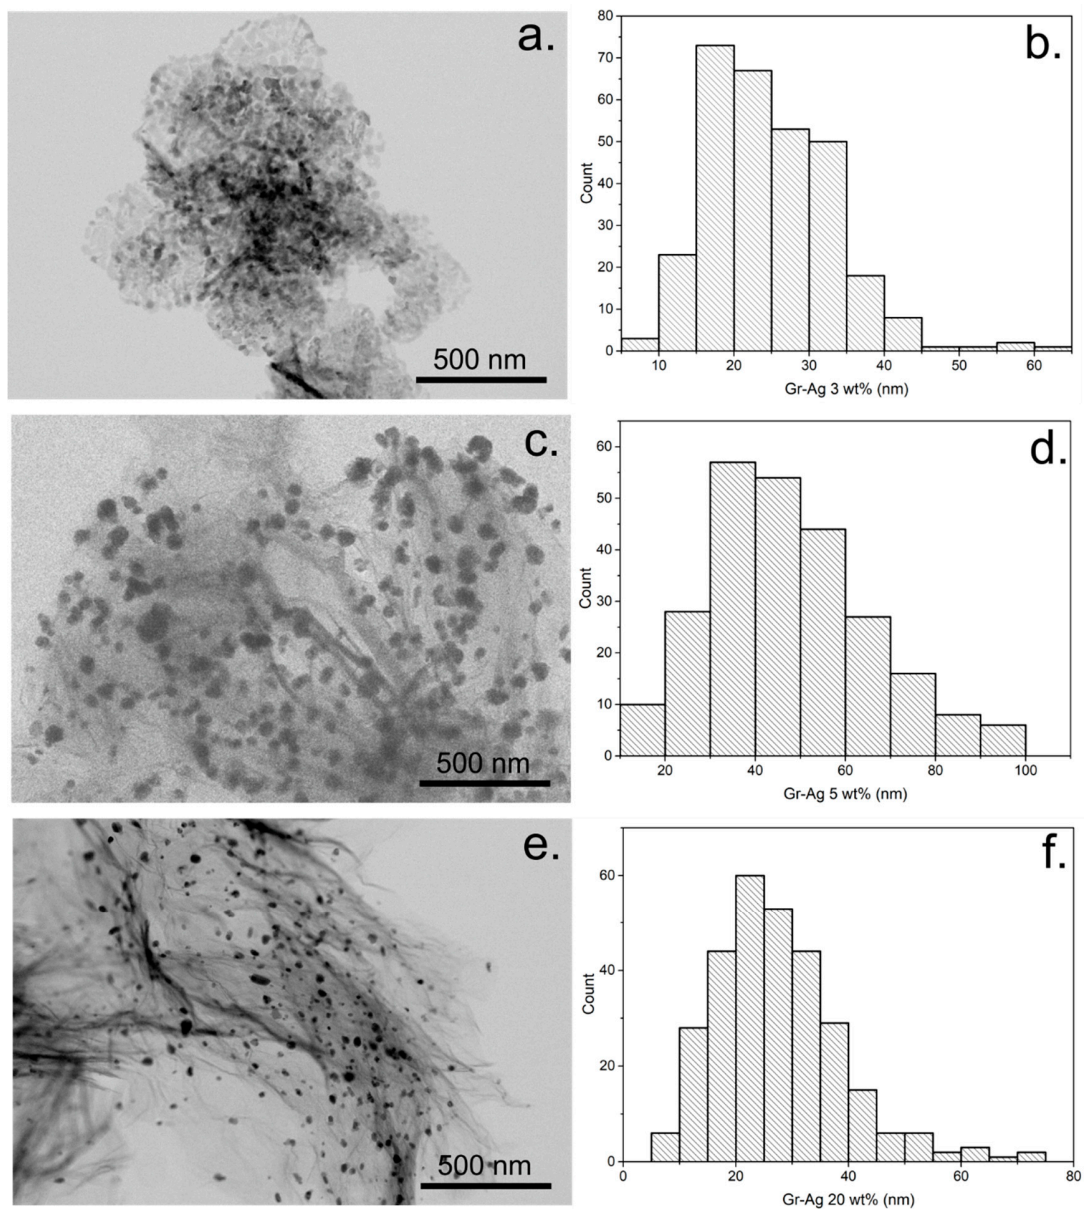

**Figure S2.** Representative TEM micrographs of Gr-Ag hybrids with various quantities of Ag and their corresponding histograms depicting the size distribution of nanoparticles: Gr-Ag (3 wt% Ag; a-b); Gr-Ag (5 wt% Ag; c-d); and Gr-Ag (20 wt% Ag; e-f).

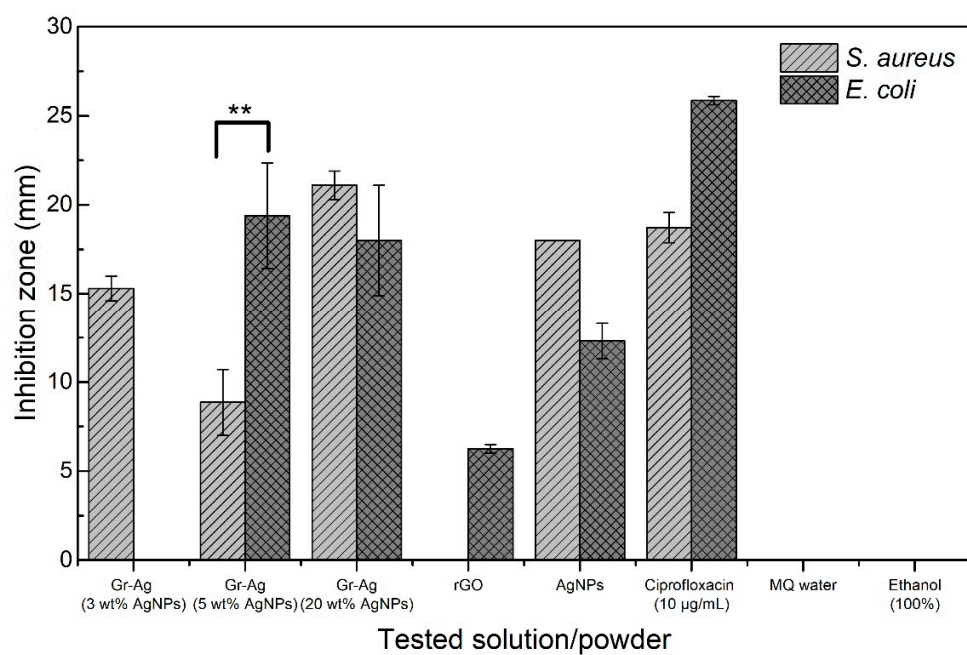

**Figure S3.** The antibacterial assessment against *S. aureus* and *E. coli* of rGO, AgNPs and Gr-Ag hybrids with different quantities of Ag; \*  $p < 0.05$ , \*\*  $p < 0.01$ , \*\*\*  $p < 0.001$  according to Students' *t* test.

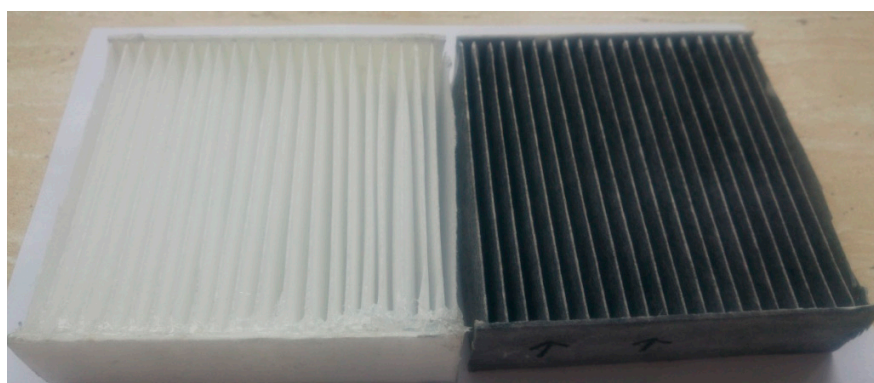

**Figure S4.** Optical images of HEPA filters before and after modification with Gr-Ag (5% Ag) material.
